# Supplementary material for: The protein kinase CK2 catalytic domain from Plasmodium falciparum: crystal structure, tyrosine kinase activity and inhibition
Source: PubMed Central journal article supplement (PMC5943518; doi:10.1038/s41598-018-25738-5), 2018-05-09
Supplement: 41598_2018_25738_MOESM1_ESM.pdf [file 41598_2018_25738_MOESM1_ESM.pdf]

**The protein kinase CK2 catalytic domain from *Plasmodium falciparum*: crystal structure, tyrosine kinase activity and inhibition**

**Supplementary data (4 supplementary figures)**

David Ruiz-Carrillo<sup>1,2,&</sup>, Jianqing Lin<sup>1,&</sup>, Abbas El Sahili<sup>1,&</sup>, Meng Wei<sup>1</sup>, Sze Siu Kwan<sup>1</sup>,  
Peter CF Cheung<sup>1</sup>, Christian Doerig<sup>3</sup>, Julien Lescar<sup>1,4\*</sup>

## Legends for the supplementary Figures

**Figure S1 The PfCK2 assymmetric unit.** **A.** View of PfCK2 asymmetric unit with monomers A, B and C shown as ribbons and colored in green cyan and pink respectively. The crystal lattice is built up such that the N-lobe of a *PfCK2* $\alpha_{D179S}$  monomer interacts with the interdomain region that harbours the active site of a neighbouring molecule with the loop Tyr<sup>61</sup>-Ans<sup>66</sup> projecting towards the ATP binding site. The alpha helical C-lobe interacts back-to-back with neighbouring molecule C domain mediated by the N-terminal polypeptide chain (Ile<sup>12</sup>-Ans<sup>38</sup>) that is sandwiched between two molecules.

**B. Cartoon representation of the *PfCK2* monomer.** The ATP molecule occupying its active site is shown with sticks, overlaid with the volumes of the R- and C-spines shown in mesh representation colored in blue and brown, with the residues involved labeled.

**Figure S2 Detailed MS analysis of the PfCK2 autophosphorylation.** The table shows the various peptides identified.

**Figure S3. Extracted ion chromatograms (XIC) of the detected un-modified and phosphorylated peptides were extracted with a window of +/- 5ppm of the precursor ions.** The area under the XIC was used to determine the extents of phosphorylation sites of Y30 and T63. **A.** Upper panel showed the XIC of the unmodified peptide YSEVFNGYDTECNRPCAIK (3+); middle panel showed the phosphorylated peptide at T63; lower panel showed the two XICs plotted in the same scale. **B.** Upper panel showed the XIC of the unmodified peptide FYADVNIHKPKEYYDYDNLELQWNKPNRYEIMK (5+); middle panel showed the phosphorylated peptide at Y30 FYADVNIHKPKEYYDY#DNLELQWNKPNRYEIMK; lower panel showed the two XICs plotted in the same graph, the XIC of the phosphorylated peptides is at 100 x scale. **C.** Upper panel showed the XIC of the deamidated peptide FYADVNIHKPKEYYDYDN#LELQWNKPNRYEIMK (5+); middle panel showed the

deamidated and phosphorylated peptide at Y30

FYADVNIHKPKKEYDY#DN#LELQWNKPNRYEIMK; lower panel showed the two XICs plotted in the same graph, the XIC of the phosphorylated peptides is in 100X scale.

**Figure S4 Isothermal Calorimetry measurement of the binding of *Pf*CK2 $\alpha_{D179S}$  and ATP by ITC at 25°C.** The syringe contained 500  $\mu$ M ATP solution, and the cell contained 50  $\mu$ M *Pf*CK2 $\alpha_{D179S}$  protein.

**A**

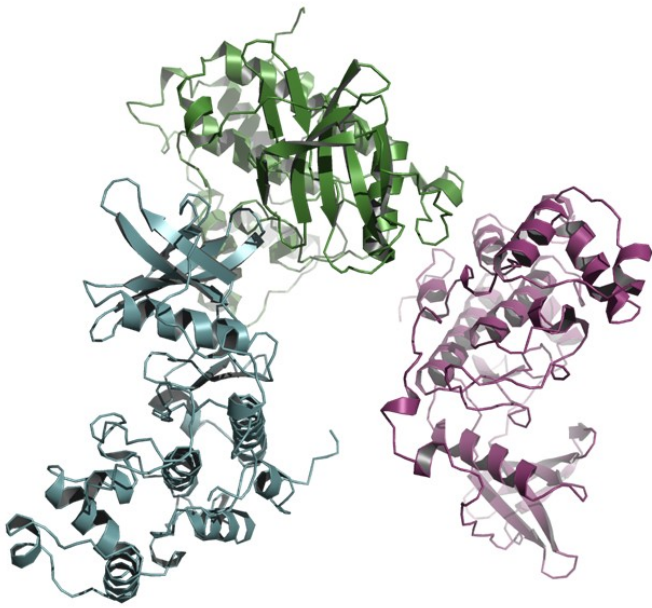

**B**

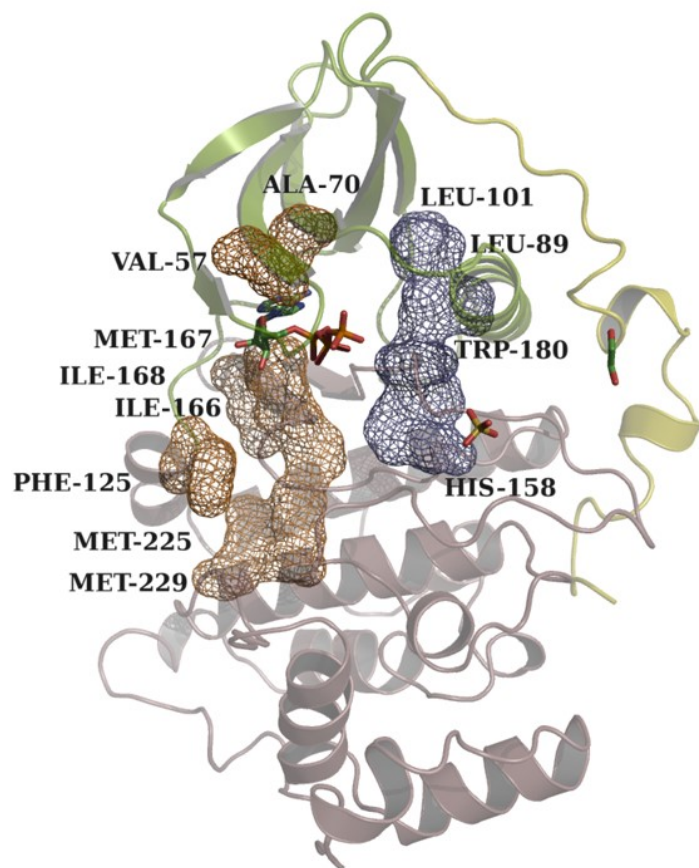

**Figure S1**

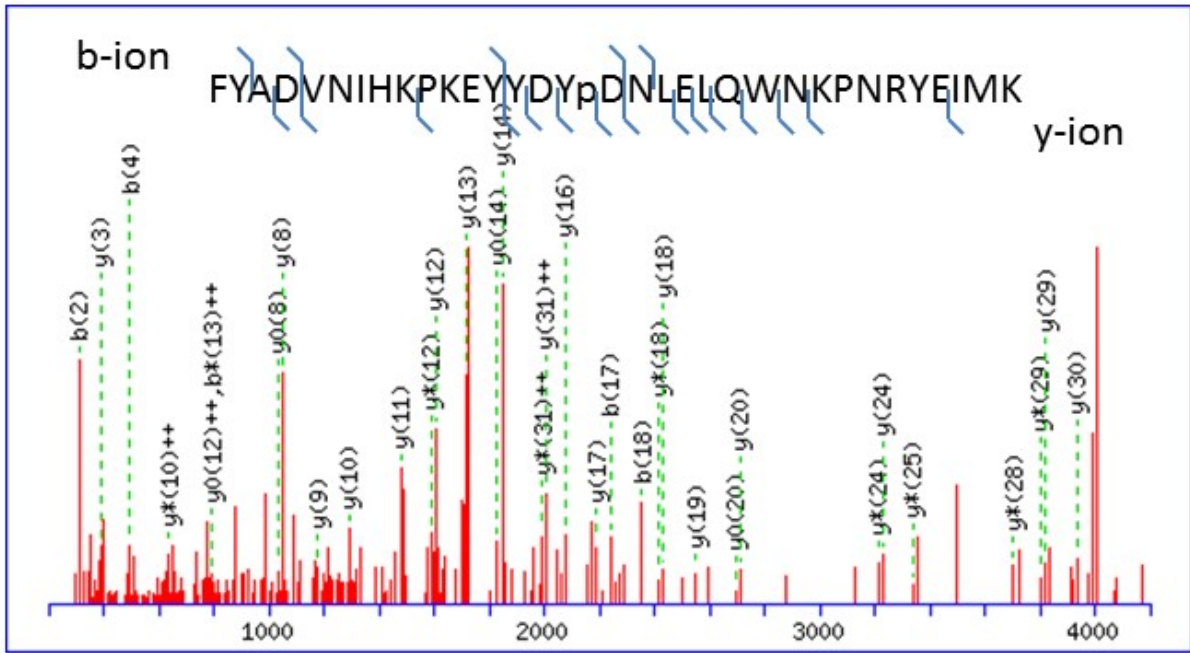

| #  | b                | b <sup>-</sup> | b <sup>+</sup> | b <sup>++</sup> | b <sup>o</sup> | b <sup>oo</sup> | Seq. | y                | y <sup>-</sup>   | y <sup>+</sup>   | y <sup>++</sup>  | y <sup>o</sup>   | y <sup>oo</sup> | #  |
|----|------------------|----------------|----------------|-----------------|----------------|-----------------|------|------------------|------------------|------------------|------------------|------------------|-----------------|----|
| 1  | 148.0757         | 74.5415        |                |                 |                |                 | F    |                  |                  |                  |                  |                  |                 | 33 |
| 2  | <b>311.1390</b>  | 156.0731       |                |                 |                |                 | Y    | 4169.9467        | 2085.4770        | 4152.9201        | 2076.9637        | 4151.9361        | 2076.4717       | 32 |
| 3  | 382.1761         | 191.5917       |                |                 |                |                 | A    | 4006.8834        | <b>2003.9453</b> | 3989.8568        | <b>1995.4320</b> | 3988.8728        | 1994.9400       | 31 |
| 4  | <b>497.2031</b>  | 249.1052       |                |                 | 479.1925       | 240.0999        | D    | <b>3935.8463</b> | 1968.4268        | 3918.8197        | 1959.9135        | 3917.8357        | 1959.4215       | 30 |
| 5  | 596.2715         | 298.6394       |                |                 | 578.2609       | 289.6341        | V    | <b>3820.8193</b> | 1910.9133        | <b>3803.7928</b> | 1902.4000        | 3802.8087        | 1901.9080       | 29 |
| 6  | 710.3144         | 355.6608       | 693.2879       | 347.1476        | 692.3039       | 346.6556        | N    | 3721.7509        | 1861.3791        | <b>3704.7243</b> | 1852.8658        | 3703.7403        | 1852.3738       | 28 |
| 7  | 823.3985         | 412.2029       | 806.3719       | 403.6896        | 805.3879       | 403.1976        | I    | 3607.7080        | 1804.3576        | 3590.6814        | 1795.8443        | 3589.6974        | 1795.3523       | 27 |
| 8  | 960.4574         | 480.7323       | 943.4308       | 472.2191        | 942.4468       | 471.7271        | H    | 3494.6239        | 1747.8156        | 3477.5974        | 1739.3023        | 3476.6133        | 1738.8103       | 26 |
| 9  | 1088.5524        | 544.7798       | 1071.5258      | 536.2665        | 1070.5418      | 535.7745        | K    | 3357.5650        | 1679.2861        | <b>3340.5384</b> | 1670.7729        | 3339.5544        | 1670.2809       | 25 |
| 10 | 1185.6051        | 593.3062       | 1168.5786      | 584.7929        | 1167.5946      | 584.3009        | P    | <b>3229.4700</b> | 1615.2387        | <b>3212.4435</b> | 1606.7254        | 3211.4595        | 1606.2334       | 24 |
| 11 | 1313.7001        | 657.3537       | 1296.6735      | 648.8404        | 1295.6895      | 648.3484        | K    | 3132.4173        | 1566.7123        | 3115.3907        | 1558.1990        | 3114.4067        | 1557.7070       | 23 |
| 12 | 1442.7427        | 721.8750       | 1425.7161      | 713.3617        | 1424.7321      | 712.8697        | E    | 3004.3223        | 1502.6648        | 2987.2958        | 1494.1515        | 2986.3117        | 1493.6595       | 22 |
| 13 | 1605.8060        | 803.4066       | 1588.7795      | <b>794.8934</b> | 1587.7954      | 794.4014        | Y    | 2875.2797        | 1438.1435        | 2858.2532        | 1429.6302        | 2857.2691        | 1429.1382       | 21 |
| 14 | 1768.8693        | 884.9383       | 1751.8428      | 876.4250        | 1750.8588      | 875.9330        | Y    | <b>2712.2164</b> | 1356.6118        | 2695.1898        | 1348.0986        | <b>2694.2058</b> | 1347.6065       | 20 |
| 15 | 1883.8963        | 942.4518       | 1866.8697      | 933.9385        | 1865.8857      | 933.4465        | D    | <b>2549.1531</b> | 1275.0802        | 2532.1265        | 1266.5669        | 2531.1425        | 1266.0749       | 19 |
| 16 | 2126.9259        | 1063.9666      | 2109.8994      | 1055.4533       | 2108.9154      | 1054.9613       | Y    | <b>2434.1261</b> | 1217.5667        | <b>2417.0996</b> | 1209.0534        | 2416.1155        | 1208.5614       | 18 |
| 17 | <b>2241.9529</b> | 1121.4801      | 2224.9263      | 1112.9668       | 2223.9423      | 1112.4748       | D    | <b>2191.0964</b> | 1096.0519        | 2174.0699        | 1087.5386        | 2173.0859        | 1087.0466       | 17 |
| 18 | <b>2355.9958</b> | 1178.5015      | 2338.9693      | 1169.9883       | 2337.9852      | 1169.4963       | N    | <b>2076.0695</b> | 1038.5384        | 2059.0430        | 1030.0251        | 2058.0589        | 1029.5331       | 16 |
| 19 | 2469.0799        | 1235.0436      | 2452.0533      | 1226.5303       | 2451.0693      | 1226.0383       | L    | 1962.0266        | 981.5169         | 1945.0000        | 973.0037         | 1944.0160        | 972.5116        | 15 |
| 20 | 2598.1225        | 1299.5649      | 2581.0959      | 1291.0516       | 2580.1119      | 1290.5596       | E    | <b>1848.9425</b> | 924.9749         | 1831.9160        | 916.4616         | <b>1830.9320</b> | 915.9696        | 14 |
| 21 | 2711.2065        | 1356.1069      | 2694.1800      | 1347.5936       | 2693.1960      | 1347.1016       | L    | <b>1719.8999</b> | 860.4536         | 1702.8734        | 851.9403         | 1701.8894        | 851.4483        | 13 |
| 22 | 2839.2651        | 1420.1362      | 2822.2386      | 1411.6229       | 2821.2545      | 1411.1309       | Q    | <b>1606.8159</b> | 803.9116         | <b>1589.7893</b> | 795.3983         | 1588.8053        | <b>794.9063</b> | 12 |
| 23 | 3025.3444        | 1513.1758      | 3008.3179      | 1504.6626       | 3007.3339      | 1504.1706       | W    | <b>1478.7573</b> | 739.8823         | 1461.7307        | 731.3690         | 1460.7467        | 730.8770        | 11 |
| 24 | 3139.3873        | 1570.1973      | 3122.3608      | 1561.6840       | 3121.3768      | 1561.1920       | N    | <b>1292.6780</b> | 646.8426         | 1275.6514        | <b>638.3293</b>  | 1274.6674        | 637.8373        | 10 |
| 25 | 3267.4823        | 1634.2448      | 3250.4558      | 1625.7315       | 3249.4717      | 1625.2395       | K    | <b>1178.6350</b> | 589.8212         | 1161.6085        | 581.3079         | 1160.6245        | 580.8159        | 9  |
| 26 | 3364.5351        | 1682.7712      | 3347.5085      | 1674.2579       | 3346.5245      | 1673.7659       | P    | <b>1050.5401</b> | 525.7737         | 1033.5135        | 517.2604         | <b>1032.5295</b> | 516.7684        | 8  |
| 27 | 3478.5780        | 1739.7926      | 3461.5515      | 1731.2794       | 3460.5674      | 1730.7874       | N    | 953.4873         | 477.2473         | 936.4608         | 468.7340         | 935.4767         | 468.2420        | 7  |
| 28 | 3634.6791        | 1817.8432      | 3617.6526      | 1809.3299       | 3616.6685      | 1808.8379       | R    | 839.4444         | 420.2258         | 822.4178         | 411.7126         | 821.4338         | 411.2205        | 6  |
| 29 | 3797.7424        | 1899.3749      | 3780.7159      | 1890.8616       | 3779.7319      | 1890.3696       | Y    | 683.3433         | 342.1753         | 666.3167         | 333.6620         | 665.3327         | 333.1700        | 5  |
| 30 | 3926.7850        | 1963.8962      | 3909.7585      | 1955.3829       | 3908.7745      | 1954.8909       | E    | 520.2799         | 260.6436         | 503.2534         | 252.1303         | 502.2694         | 251.6383        | 4  |
| 31 | 4039.8691        | 2020.4382      | 4022.8425      | 2011.9249       | 4021.8585      | 2011.4329       | I    | <b>391.2374</b>  | 196.1223         | 374.2108         | 187.6090         |                  |                 | 3  |
| 32 | 4170.9096        | 2085.9584      | 4153.8830      | 2077.4452       | 4152.8990      | 2076.9531       | M    | 278.1533         | 139.5803         | 261.1267         | 131.0670         |                  |                 | 2  |
| 33 |                  |                |                |                 |                |                 | K    | 147.1128         | 74.0600          | 130.0863         | 65.5468          |                  |                 | 1  |

Figure S2

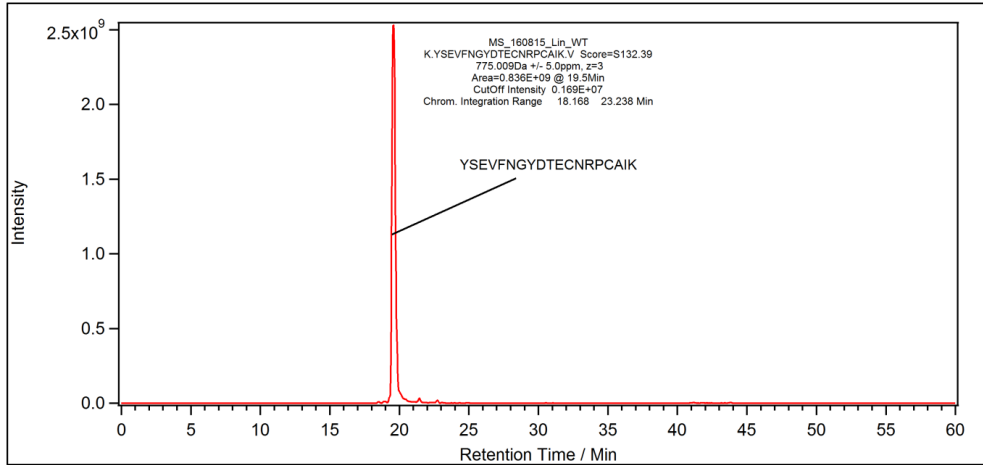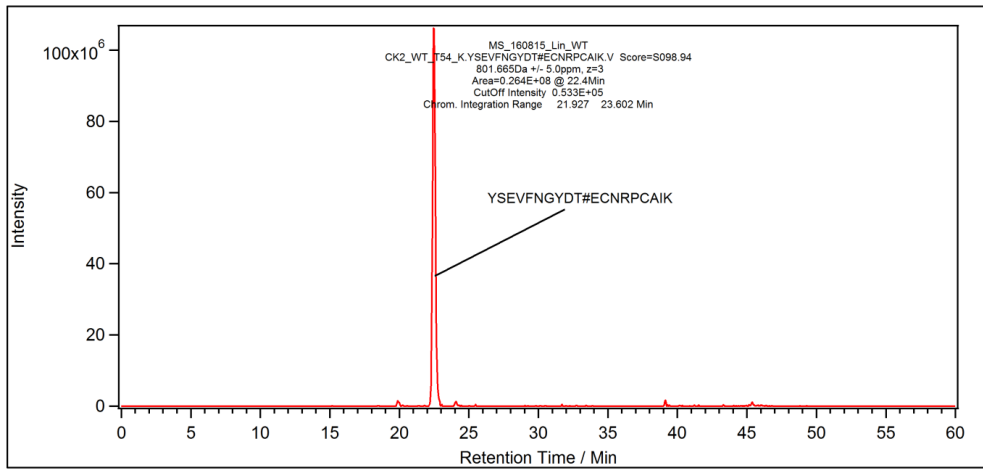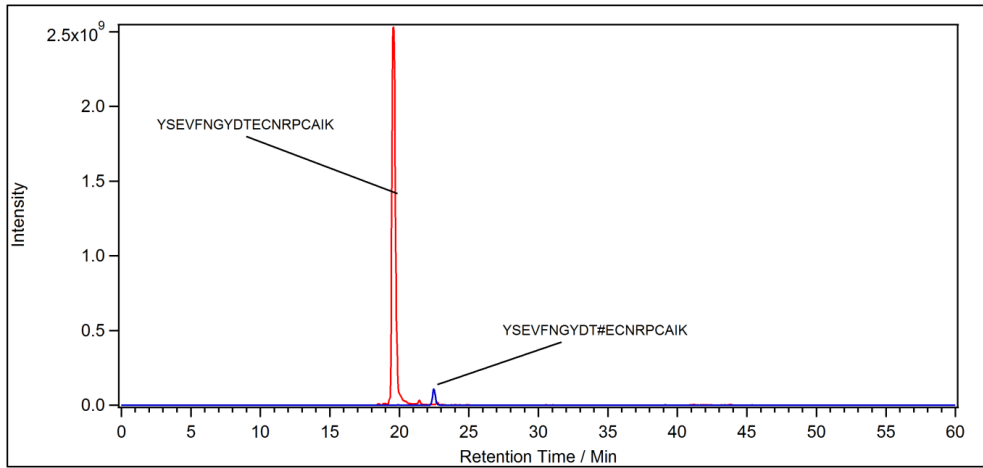

Figure S3A

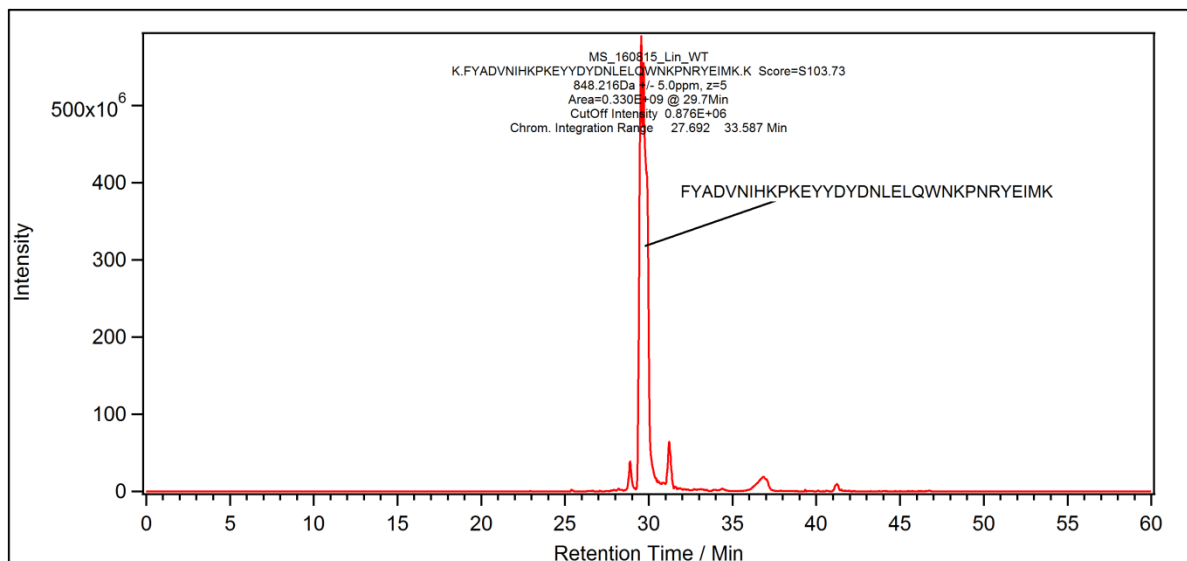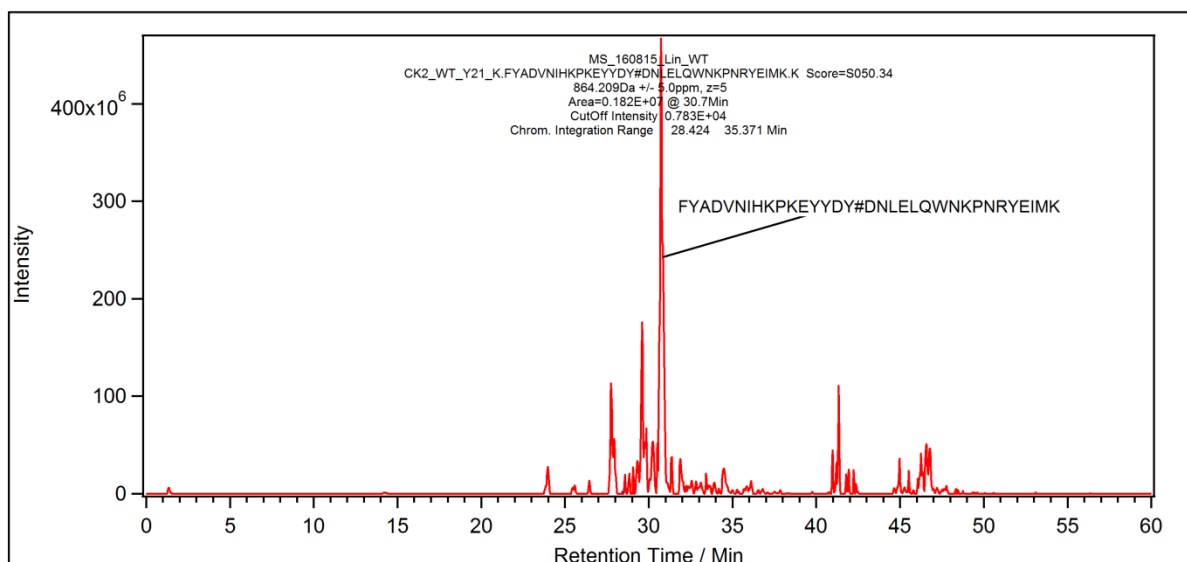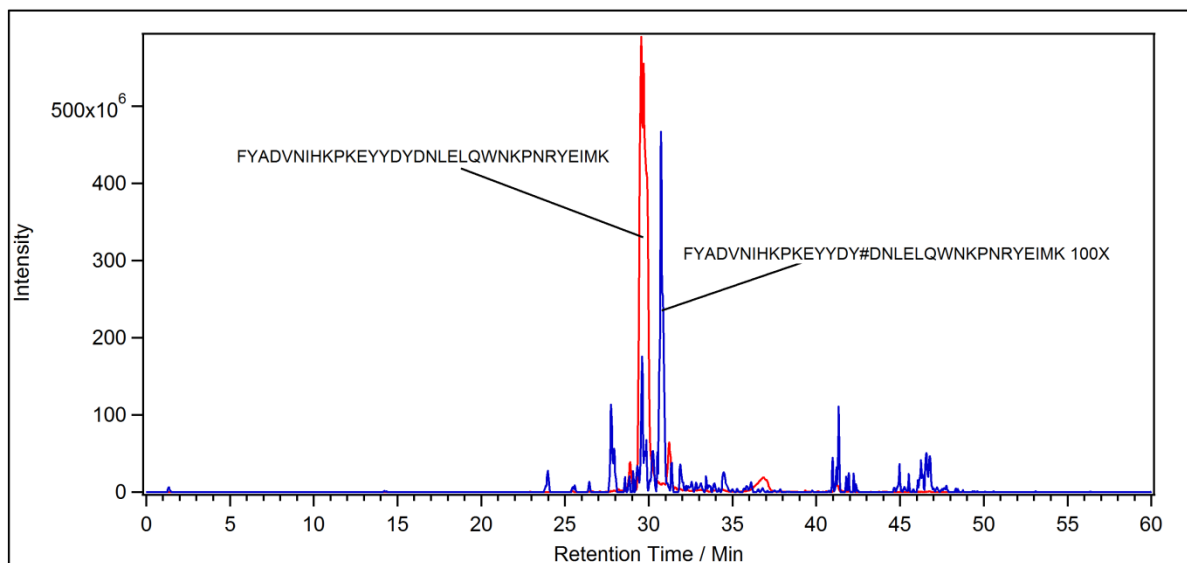

Fig. S3B

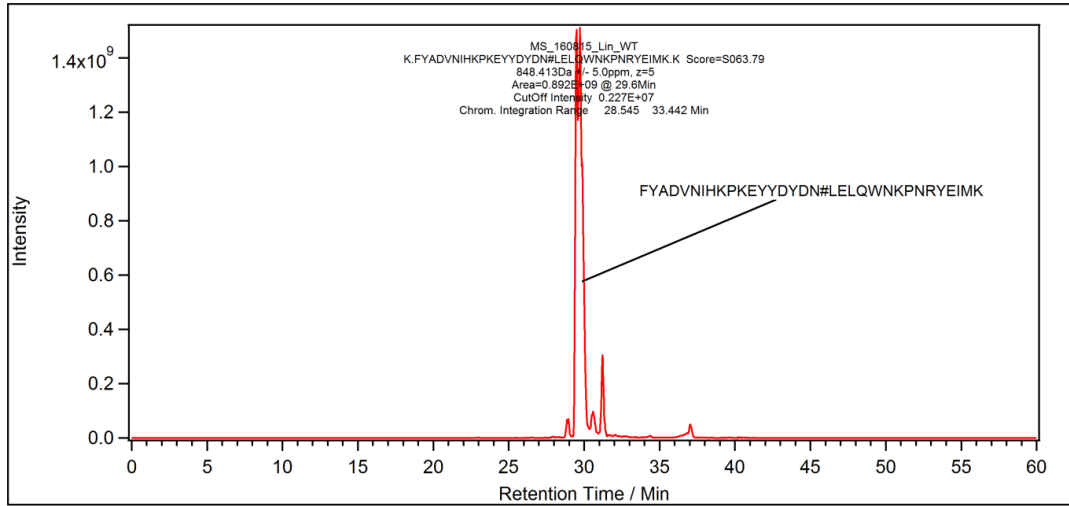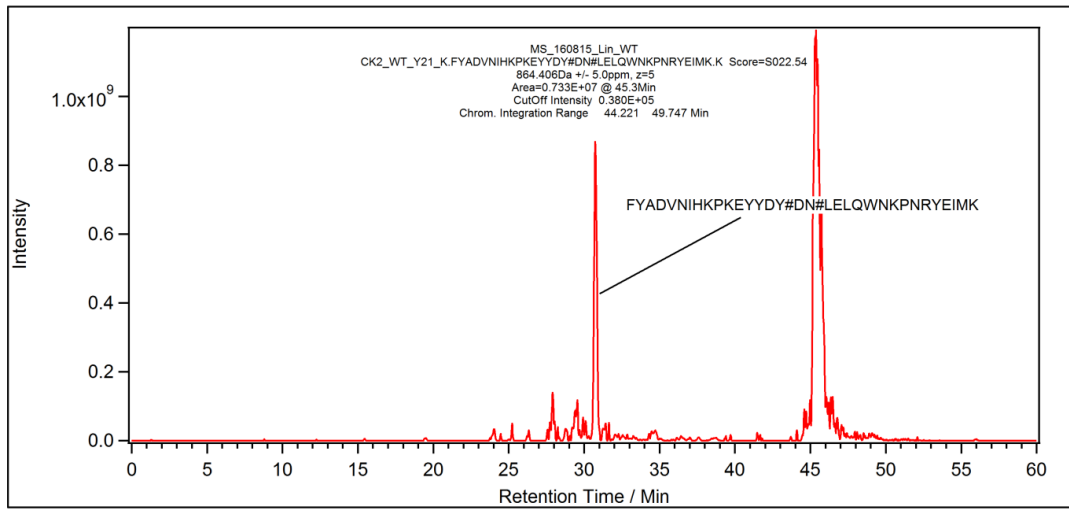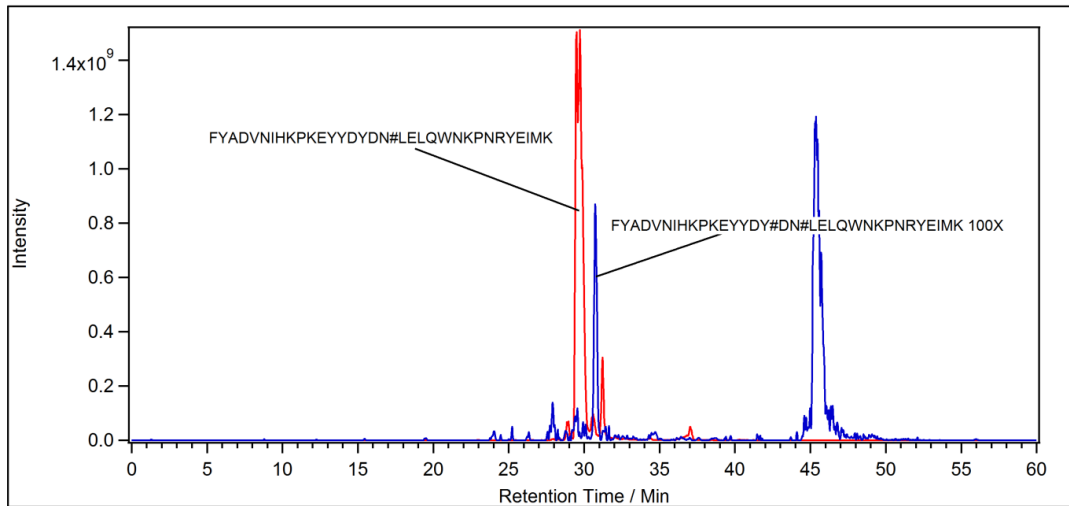

Fig. S3C



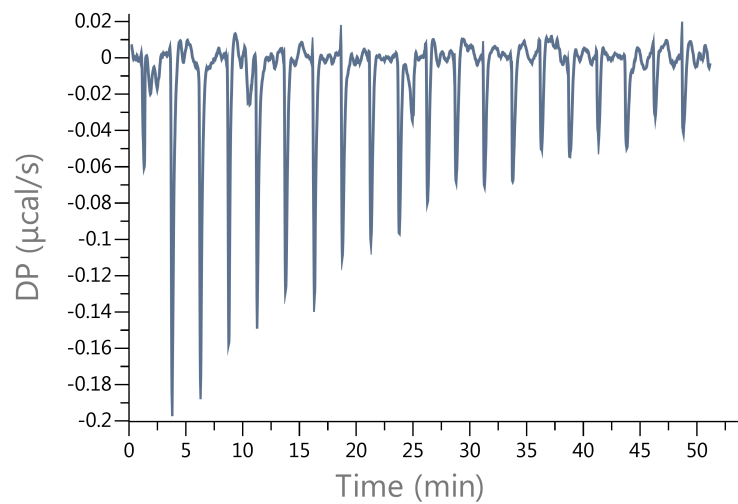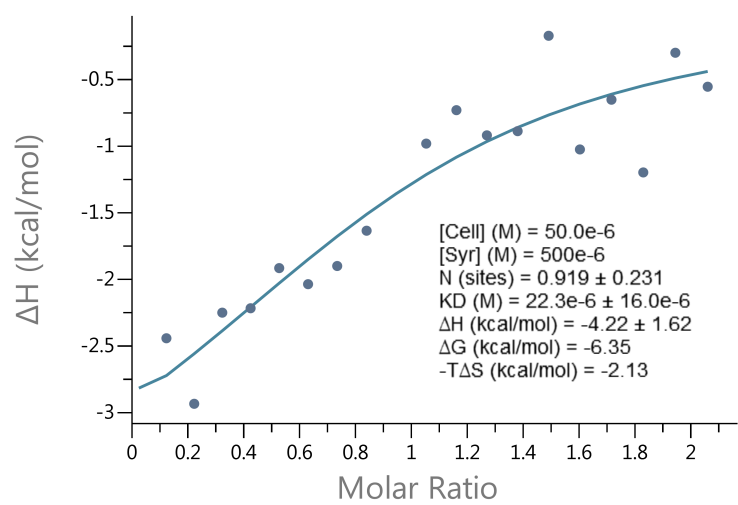

**Figure S4**
